# Supplementary material
Source: PubMed Central journal article supplement (PMC8433594)
Supplement: mmc1.pdf [file mmc1.pdf]

**Table S1:** Binding Kinetics of the interaction between SARS-CoV-2 RBD and sACE2 quantified by Biolayer Interferometry.

| RBD   | ACE2 binding<br>(RBD/biolyer interferometry) |             |                      |             |                       |             |
|-------|----------------------------------------------|-------------|----------------------|-------------|-----------------------|-------------|
|       | KD (nM)                                      | Fold change | Ka (1/Ms)            | Fold change | Kdis (1/s)            | Fold change |
| WT    | 161                                          | 1           | 4.27x10 <sup>4</sup> | 1           | 6.88x10 <sup>-3</sup> | 1           |
| N501Y | 41.5                                         | 3.88        | 3.59x10 <sup>4</sup> | 0.84        | 1.49x10 <sup>-3</sup> | 0.22        |
| K417N | 215                                          | 0.75        | 6.65x10 <sup>4</sup> | 1.56        | 1.43x10 <sup>-2</sup> | 2.07        |
| K417T | 245                                          | 0.66        | 4.76x10 <sup>4</sup> | 1.11        | 1.17x10 <sup>-2</sup> | 1.70        |
| E484K | 132                                          | 1.22        | 5.53x10 <sup>4</sup> | 1.29        | 7.31x10 <sup>-3</sup> | 1.06        |
| L452R | 176                                          | 0.91        | 2.74x10 <sup>4</sup> | 0.64        | 4.84x10 <sup>-3</sup> | 0.70        |

**Table S2. Summary of ACE2 Binding, Plasma binding, and Neutralization to Spike variants.**

| Variant / mutant |                 | ACE2 binding <sup>a</sup> | Spike recognition by plasma <sup>b</sup> |                                                           |                                             | Neutralization <sup>c</sup><br>ID50 (ratio to D614G) |
|------------------|-----------------|---------------------------|------------------------------------------|-----------------------------------------------------------|---------------------------------------------|------------------------------------------------------|
|                  |                 |                           | Previously infected (8 months PSO)       | Previously infected Vaccinated (3 weeks post-vaccination) | Naïve vaccinated (3 weeks post-vaccination) |                                                      |
|                  | D614G           | 1.00                      | 1.00                                     | 1.00                                                      | 1.00                                        | 3852 (1)                                             |
| B.1.1.7          | Full variant    | 5.43                      | 1.15                                     | 1.00                                                      | 0.78                                        | 2492 (0.65)                                          |
|                  | D614G/Δ69-70    | 1.51                      | 1.33                                     | 1.14                                                      | 0.92                                        |                                                      |
|                  | D614G/Δ144      | 0.95                      | 1.14                                     | 0.93                                                      | 0.90                                        |                                                      |
|                  | D614G/N501Y     | 2.52                      | 1.65                                     | 1.17                                                      | 1.09                                        |                                                      |
|                  | D614G/A570D     | 1.18                      | 1.29                                     | 1.01                                                      | 1.04                                        |                                                      |
|                  | D614G/P681H     | 0.81                      | 1.26                                     | 0.88                                                      | 0.90                                        |                                                      |
|                  | D614G/T716I     | 0.89                      | 1.58                                     | 0.98                                                      | 0.68                                        |                                                      |
|                  | D614G/S982A     | 0.77                      | 1.06                                     | 0.50                                                      | 0.89                                        |                                                      |
|                  | D614G/D1118H    | 1.23                      | 1.96                                     | 1.09                                                      | 0.93                                        |                                                      |
| B.1.351          | Full variant    | 3.56                      | 0.96                                     | 1.28                                                      | 1.17                                        | 1211 (0.31)                                          |
|                  | D614G/L18F      | 0.93                      | 1.66                                     | 1.30                                                      | 0.79                                        |                                                      |
|                  | D614G/D80A      | 1.00                      | 2.11                                     | 1.64                                                      | 0.74                                        |                                                      |
|                  | D614G/D215G     | 1.19                      | 2.29                                     | 1.79                                                      | 0.77                                        |                                                      |
|                  | D614G/ Δ242-244 | 0.74                      | 1.97                                     | 1.43                                                      | 0.73                                        |                                                      |
|                  | D614G/R246I     | 0.66                      | 1.53                                     | 1.05                                                      | 0.69                                        |                                                      |
|                  | D614G/K417N     | 0.13                      | 2.16                                     | 1.76                                                      | 0.57                                        |                                                      |
|                  | D614G/E484K     | 0.82                      | 1.42                                     | 1.16                                                      | 1.06                                        |                                                      |
|                  | D614G/N501Y     | 2.52                      | 1.65                                     | 1.17                                                      | 1.09                                        |                                                      |
| D614G/A701V      | 0.99            | 0.90                      | 0.84                                     | 0.91                                                      |                                             |                                                      |
| P.1              | Full variant    | 4.24                      | 0.77                                     | 0.88                                                      | 0.79                                        | 4445 (1.15)                                          |
|                  | D614G/L18F      | 0.93                      | 1.66                                     | 1.30                                                      | 0.79                                        |                                                      |
|                  | D614G/T20N      | 1.96                      | 1.65                                     | 1.29                                                      | 0.72                                        |                                                      |
|                  | D614G/P26S      | 1.58                      | 0.93                                     | 0.81                                                      | 0.73                                        |                                                      |
|                  | D614G/D138Y     | 1.32                      | 0.64                                     | 0.73                                                      | 0.64                                        |                                                      |
|                  | D614G/R190S     | 1.82                      | 1.09                                     | 0.84                                                      | 0.63                                        |                                                      |
|                  | D614G/K417T     | 0.78                      | 1.10                                     | 1.04                                                      | 0.91                                        |                                                      |
|                  | D614G/E484K     | 0.85                      | 1.42                                     | 1.16                                                      | 1.06                                        |                                                      |
|                  | D614G/N501Y     | 2.52                      | 1.65                                     | 1.17                                                      | 1.09                                        |                                                      |
| D614G/H655Y      | 1.21            | 1.48                      | 1.04                                     | 0.92                                                      |                                             |                                                      |
| D614G/T1027I     | 0.59            | 1.56                      | 0.76                                     | 0.82                                                      |                                             |                                                      |
| B.1.526          | Full variant    | 1.78                      | 1.02                                     | 1.34                                                      | 1.19                                        | 1686 (0.44)                                          |
|                  | D614G/L5F       | 0.91                      | 1.00                                     | 1.23                                                      | 0.91                                        |                                                      |
|                  | D614G/T95I      | 0.75                      | 1.00                                     | 1.16                                                      | 0.98                                        |                                                      |
|                  | D614G/D253G     | 0.93                      | 0.84                                     | 1.01                                                      | 0.84                                        |                                                      |
|                  | D614G/E484K     | 0.85                      | 1.42                                     | 1.16                                                      | 1.06                                        |                                                      |
|                  | D614G/A701V     | 0.99                      | 0.90                                     | 0.84                                                      | 0.91                                        |                                                      |
| B.1.429          | Full variant    | 2.82                      | 0.91                                     | 0.90                                                      | 0.89                                        | 2591 (0.67)                                          |
|                  | D614G/S13I      | 1.42                      | 0.84                                     | 0.93                                                      | 0.79                                        |                                                      |
|                  | D614G/W152C     | 1.33                      | 0.87                                     | 0.97                                                      | 0.76                                        |                                                      |
|                  | D614G/L452R     | 2.66                      | 2.15                                     | 0.95                                                      | 0.86                                        |                                                      |
| B.1.617          | Full variant    | 1.85                      | 0.82                                     | 0.77                                                      | 0.85                                        | 2795 (0.73)                                          |
| B.1.617.1        | Full variant    | 1.12                      | 0.50                                     | 0.56                                                      | 0.61                                        | 2489 (0.65)                                          |
| B.1.617.2        | Full variant    | 2.34                      | 0.52                                     | 0.61                                                      | 0.53                                        | 601 (0.16)                                           |

- a) ACE2-Fc binding was normalized to CV3-25 binding in each experiment. Values are presented as ratio of normalized ACE2-Fc binding obtain with the D614G Spike. Values represent the means of data obtained from at least three independent experiments.
- b) Plasma binding were normalized to CV3-25 in each experiment. Values are presented as ratio of normalized plasma binding obtained with the D614G Spike. Values represent the means of data obtained with 3-5 plasma from the same group.
- c) The ID50 represents the plasma dilution to inhibit 50% of the infection of 293T-ACE2 cells by recombinant viruses bearing the indicated Spike. Values are presented as the means of ID50 and as ratio of the ID50 obtained with virus bearing the D614G Spike. Values represent the means of data obtained with 3-5 different plasma.

**Table S3. List of single mutations of Spike Variants.**

| <b>B.1.1.7</b> | <b>B.1.351</b> | <b>P.1</b> | <b>B.1.526</b> | <b>B.1.429</b> | <b>B.1.617</b> | <b>B.1.617.1</b> | <b>B.1.617.2</b> |
|----------------|----------------|------------|----------------|----------------|----------------|------------------|------------------|
| Δ69-70         | L18F           | L18F       | L5F            | S13I           | L452R          | E154K            | T19R             |
| Δ144           | D80A           | T20N       | T95I           | W152C          | E484Q          | L452R            | Δ156-158         |
| N501Y          | D215G          | P26S       | D253G          | L452R          | D614G          | E484Q            | L452R            |
| A570D          | Δ242-244       | D138Y      | E484K          | D614G          |                | D614G            | T478K            |
| D614G          | R246I          | R190S      | D614G          |                |                | P681R            | D614G            |
| P681H          | K417N          | K417T      | A701V          |                |                |                  | P681R            |
| T716I          | E484K          | E484K      |                |                |                |                  | D950N            |
| S982A          | N501Y          | N501Y      |                |                |                |                  |                  |
| D1118H         | D614G          | D614G      |                |                |                |                  |                  |
|                | A701V          | H655Y      |                |                |                |                  |                  |
|                |                | T1027I     |                |                |                |                  |                  |

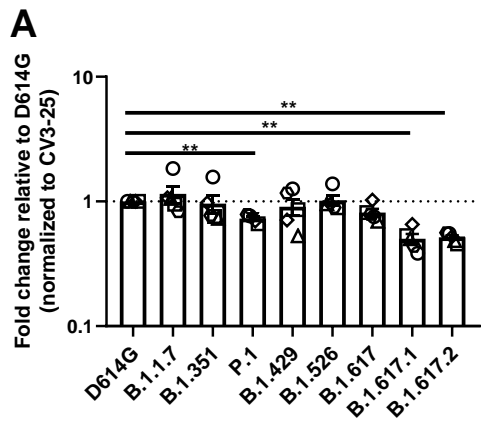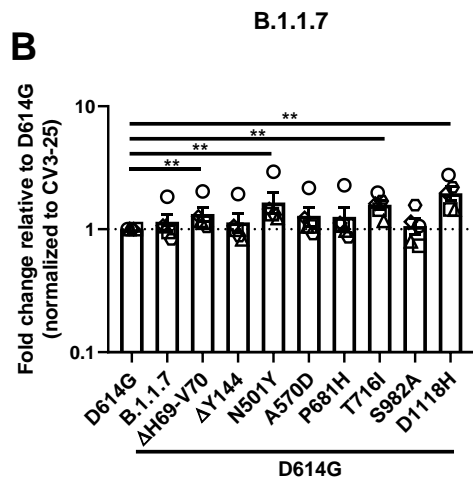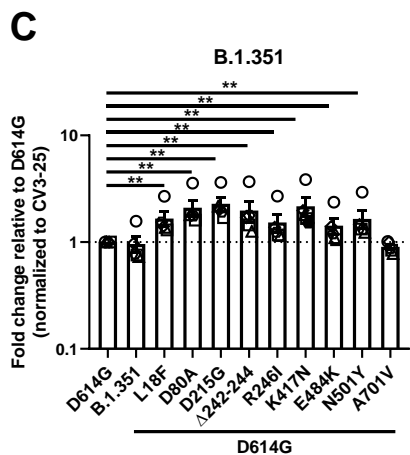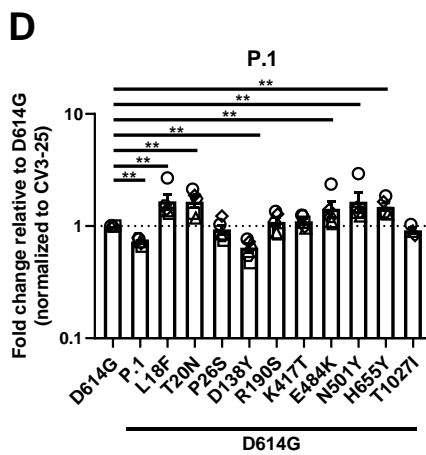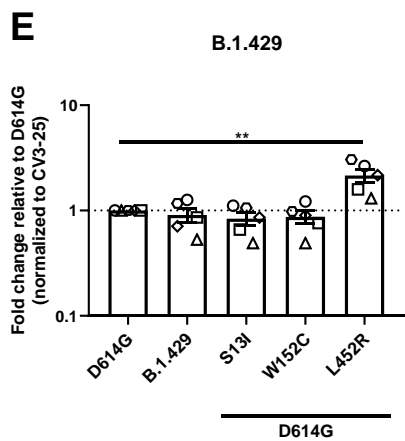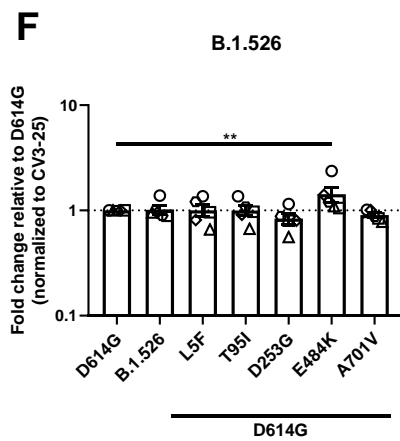

Figure S1

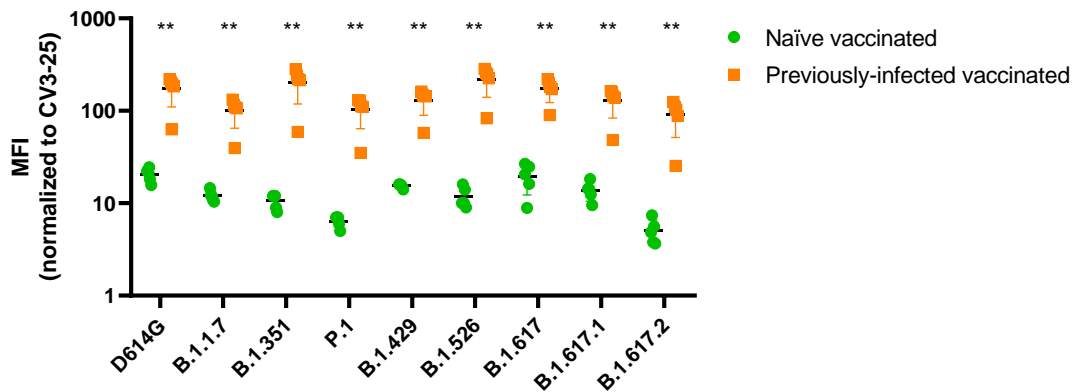

Figure S2
